# Supplementary material
Source: MDPI journal article supplement (https://www.mdpi.com/2311-7524/9/7/776)
Supplement: s1 [file s1]

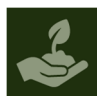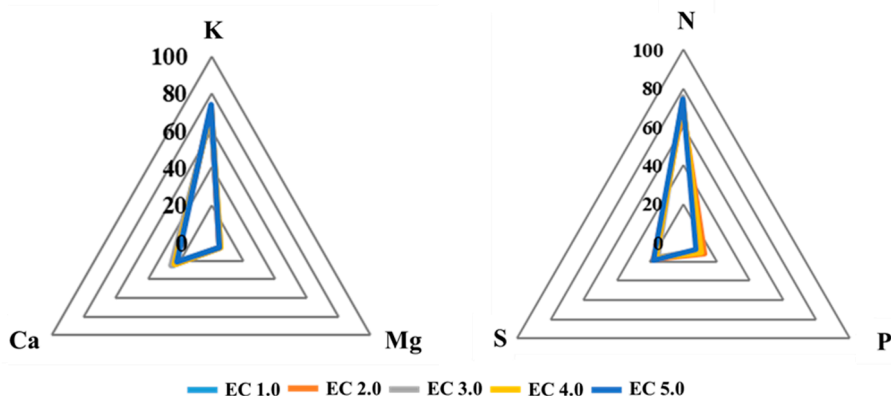

Figure S1. Mutual ratio of cation and anion compositions of coastal glehnia grown in Hoagland nutrient solution with five different EC levels (n = 5).

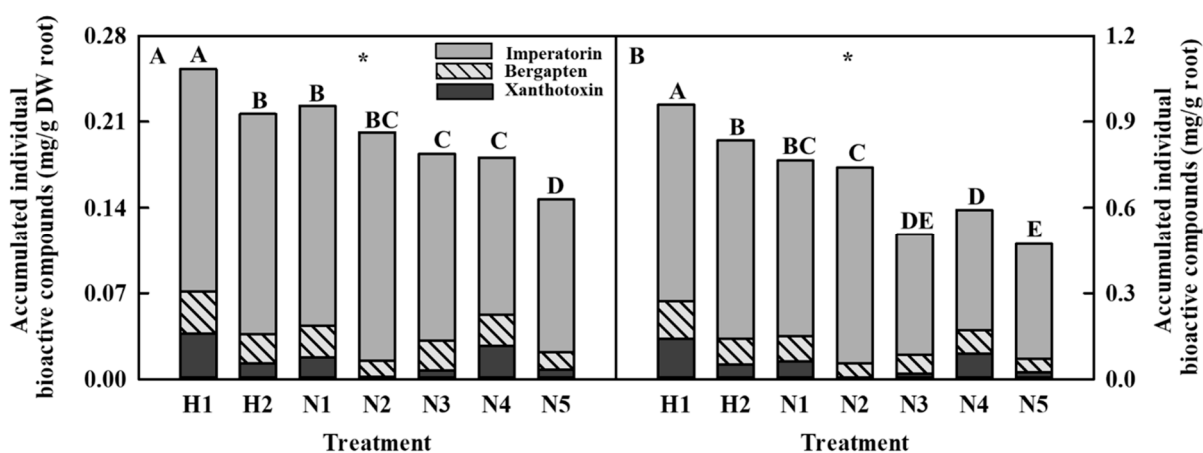

Figure S2. Accumulated individual bioactive compounds of coastal glehnia per mg (A) of root and whole root (B) with four consecutive harvests in plants grown in Hoagland and newly developed nutrient solutions with various EC levels for 23 weeks after transplanting. Different letters in the figures indicate significant differences. \*, indicates significance at p < 0.05 (n = 4).

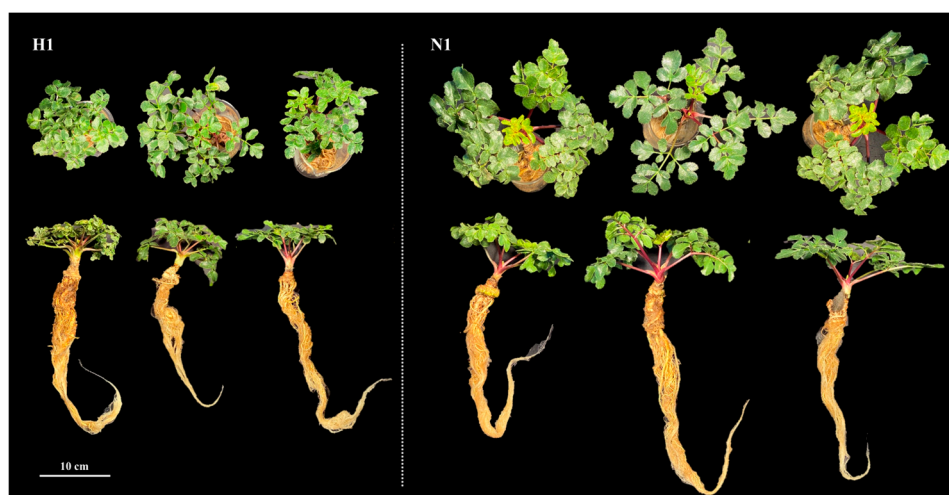

Figure S3. Coastal glehnia grown in Hoagland (H1) and newly developed nutrient solutions (N1) with EC 1.0 dS·m<sup>-1</sup>.

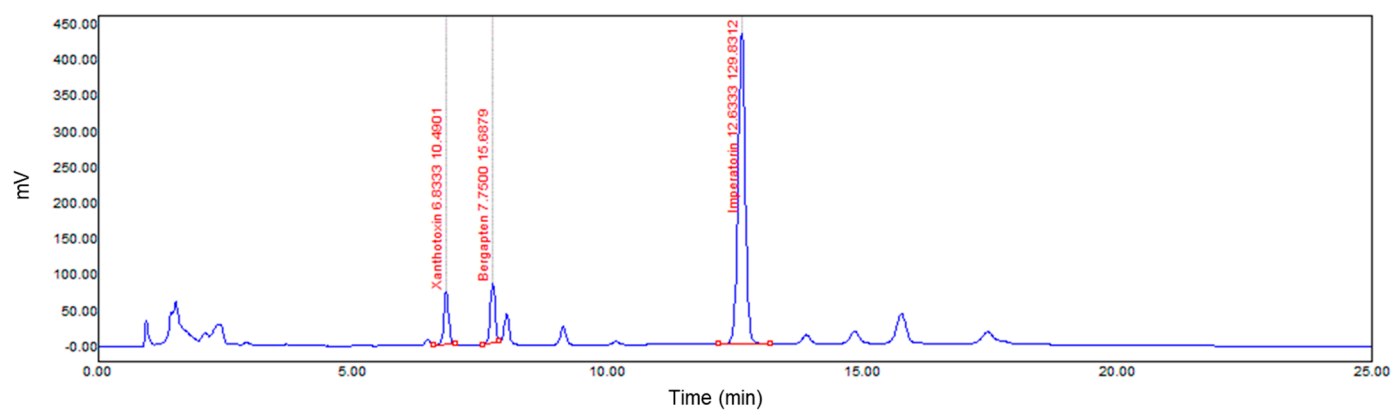

Figure S4. HPCL chromatogram of coastal glehnia grown in newly developed nutrient solutions.
